# Supplementary material
Source: publisher figshare collection journal article supplement (https://acs.figshare.com/ndownloader/files/20406363)
Supplement: Supplementary file 1 [file 20406363]

**Supporting Information for:**

# Zwitterionic Stealth Dye-Loaded Polymer Nanoparticles for Intracellular Imaging

*Anne Runser, Denis Dujardin, Pauline Ernst, Andrey S. Klymchenko,\* Andreas Reisch\**

Laboratoire de Bioimagerie et Pathologies, CNRS UMR 7021, Université de Strasbourg,  
Faculté de Pharmacie, 67401 Illkirch Cedex, France.

E-mail: [reisch@unistra.fr](mailto:reisch@unistra.fr); [andrey.klymchenko@unistra.fr](mailto:andrey.klymchenko@unistra.fr)

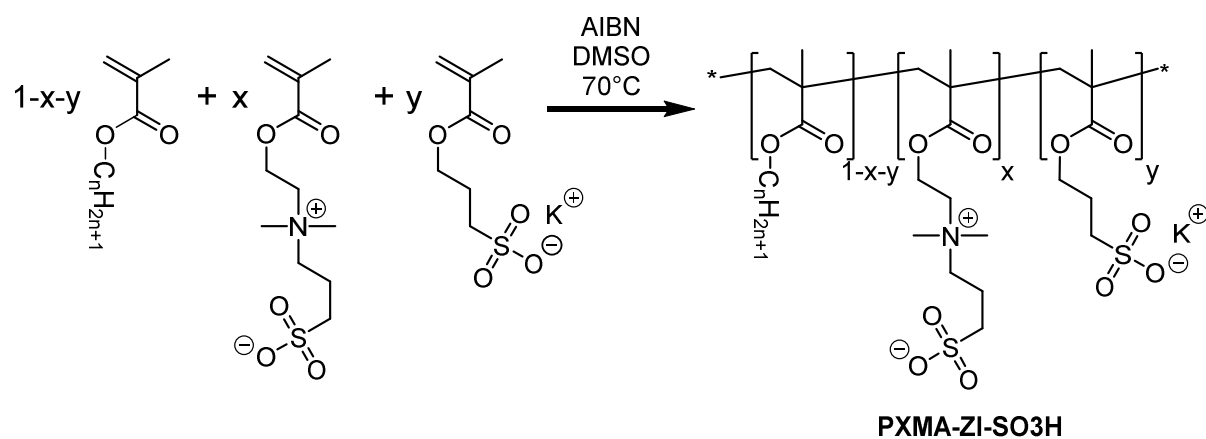

**Scheme S1.** Polymerization of alkyl methacrylate, ZI and sulfonate monomers to obtain methacrylate polymers bearing zwitterionic and charged groups.

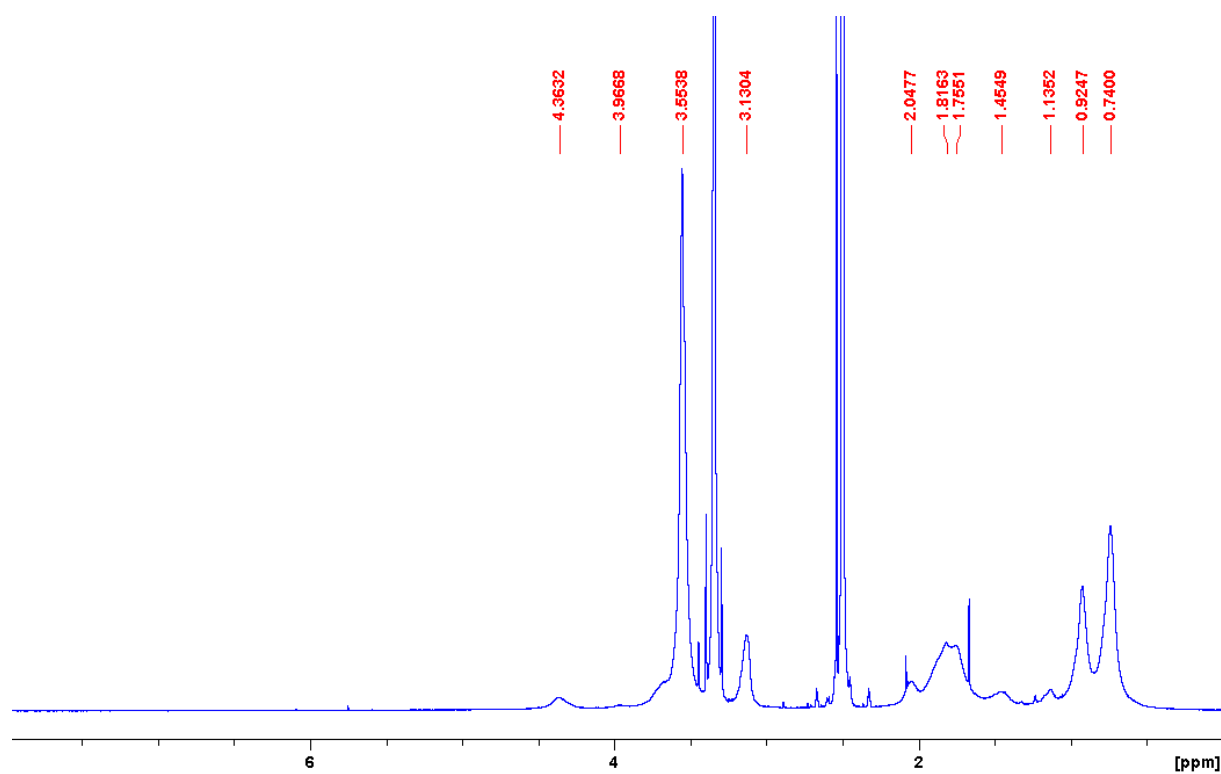

**Figure S1.** <sup>1</sup>H-NMR spectrum of PMMA-ZI-10%-SO<sub>3</sub>H-1% in DMSO-d<sub>6</sub>.

**Table S1.** Sizes of NPs made of different polymers as obtained from TEM, DLS, and FCS.<sup>a</sup>

| Polymer      |                          |           | Size (nm)        |                  |                  |
|--------------|--------------------------|-----------|------------------|------------------|------------------|
| Main monomer | SO <sub>3</sub> H (mol%) | ZI (mol%) | TEM <sup>b</sup> | DLS <sup>b</sup> | FCS <sup>c</sup> |
| MMA          | 1                        | -         | 13 ± 3           | -                | 14 ± 1           |
| MMA          | 1                        | 10        | 11 ± 3           | 11 ± 1           | 15 ± 1           |
| MMA          | 2                        | -         | 9 ± 3            | -                | 14 ± 1           |
| MMA          | 2                        | 10        | 9 ± 2            | -                | 13 ± 1           |
| EMA          | 1                        | 10        | 14 ± 3           | 10 ± 1           | 11 ± 1           |
| PMA          | 1                        | 10        | 22 ± 4           | 19 ± 2           | 13 ± 1           |
| BMA          | 1                        | 10        | 35 ± 7           | 31 ± 2           | 32 ± 4           |

<sup>a</sup> Errors correspond to width of the distribution at half maximum (FWHM) for TEM, and standard error of the mean (s.e.m.) over 3 measurements for DLS and FCS.<sup>b</sup> NPs prepared with 10 wt% R18/F5-TPB. <sup>c</sup> NPs prepared with 1 wt% R18/F5-TPB.

**Table S2.** Sizes of PMMA-ZI-10%-SO<sub>3</sub>H-1% NPs at different pH values as measured by DLS.<sup>a</sup>

| pH <sup>b</sup> | Mean size (nm) |
|-----------------|----------------|
| 3.6             | 14 ± 1         |
| 5.0             | 15 ± 1         |
| 7.4             | 14 ± 1         |
| 9.0             | 15 ± 2         |

<sup>a</sup> NPs were loaded with 10 wt% of R18/F5-TPB. <sup>b</sup> For adjusting the pH we used the following buffer solutions: acetate buffer for pH 3.6 and 5; phosphate buffer for pH 7.4; borate buffer for pH 9; all at 5 mM.

**Table S3.** Zeta potential of dye-loaded NPs made from different polymers.

| polymer                          | Zeta potential (mV) |
|----------------------------------|---------------------|
| PMMA-SO <sub>3</sub> H-1%        | -24                 |
| PMMA-ZI-10%-SO <sub>3</sub> H-1% | -21                 |
| PEMA-ZI-10%-SO <sub>3</sub> H-1% | -28                 |
| PPMA-ZI-10%-SO <sub>3</sub> H-1% | -34                 |

**Table S4.** FCS results: concentration, diameter and brightness obtained for the different zwitterionic NP solutions before and 5 min after addition of 10% fetal bovine serum (FBS).<sup>a</sup>

|                           | ZI % | FBS addition (vol%) | Concentration (nM) | Diameter (nm) | Brightness relative to TMR |
|---------------------------|------|---------------------|--------------------|---------------|----------------------------|
| PMMA-SO <sub>3</sub> H-2% | 0    | -                   | 18.6               | 14.1          | 5.0                        |
|                           |      | 10                  | 14.7               | 22.6          | 4.3                        |
|                           | 2    | -                   | 12.9               | 15.2          | 5.5                        |
|                           |      | 10                  | 12.2               | 24.6          | 4.4                        |
|                           | 5    | -                   | 30.7               | 8.0           | 2.7                        |
|                           |      | 10                  | 23.3               | 12.4          | 2.5                        |
|                           | 10   | -                   | 26.1               | 13.2          | 3.1                        |
|                           |      | 10                  | 20.2               | 14.6          | 2.9                        |
| PMMA-SO <sub>3</sub> H-1% | 0    | -                   | 17.9               | 14.0          | 6.0                        |
|                           |      | 10                  | 10.8               | 23.5          | 5.9                        |
|                           | 10   | -                   | 14.8               | 14.9          | 5.3                        |
|                           |      | 10                  | 14.5               | 15.4          | 4.6                        |
| PEMA-SO <sub>3</sub> H-1% | 10   | -                   | 34.5               | 11.0          | 2.0                        |
|                           |      | 10                  | 26.4               | 14.3          | 2.4                        |
| PPMA-SO <sub>3</sub> H-1% | 10   | -                   | 9.6                | 12.5          | 5.8                        |
|                           |      | 10                  | 7.8                | 15.9          | 5.7                        |
| PBMA-SO <sub>3</sub> H-1% | 10   | -                   | 4.2                | 31.8          | 22.1                       |
|                           |      | 10                  | 1.6                | 45.5          | 26.4                       |

<sup>a</sup> NPs prepared with 1 wt% R18/F5-TPB.

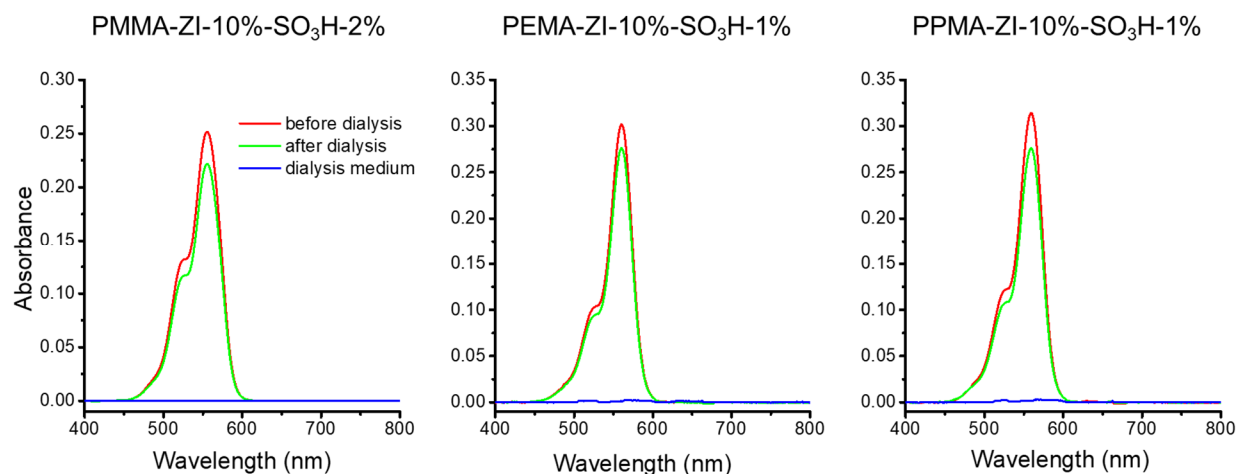

**Figure S2.** Absorbance spectra measured for solutions of PXMA-ZI-10%-SO<sub>3</sub>H-1 or 2% NPs loaded with 10 wt% of R18/F5-TPB before (red) and after (green) dialysis for 24 h. The blue curve corresponds to the dialysis medium after dialysis.

**Table S5.** Release of dye from NPs made from different polymers over 24 h.<sup>a</sup>

| polymer                          | loss of R18/F5-TPB <sup>b</sup> |
|----------------------------------|---------------------------------|
| PMMA-ZI-10%-SO <sub>3</sub> H-2% | 14 %                            |
| PEMA-ZI-10%-SO <sub>3</sub> H-1% | 9 %                             |
| PPMA-ZI-10%-SO <sub>3</sub> H-1% | 12 %                            |

<sup>a</sup> Release was tested by dialysis for 24 h against a 1 mM solution of  $\beta$ -cyclodextrin. Absorbance spectra were recorded for the NP solution before and for the NP solution and the dialysis solution after dialysis (Figure S5). <sup>b</sup> Relative to amount of R18/F5-TPB before dialysis.

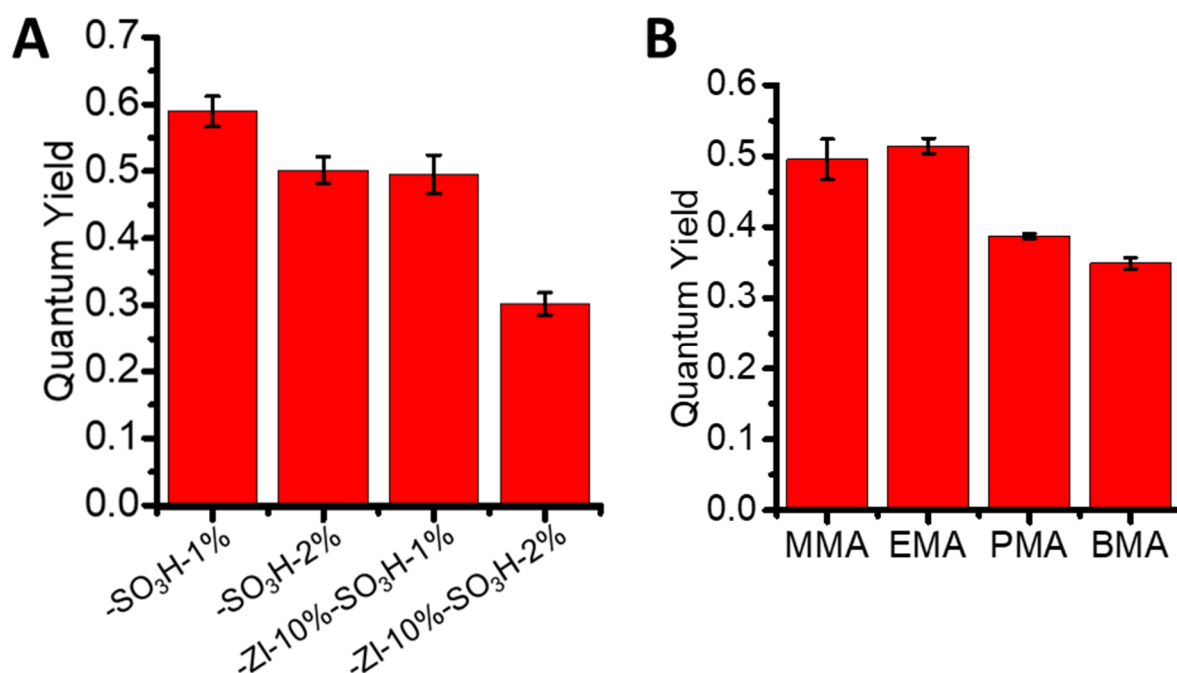

**Figure S3.** Quantum yield of dye-loaded NPs. NPs were made from (A) PMMA- $\text{SO}_3\text{H-1\%}$  and 2%, PMMA-ZI-10%- $\text{SO}_3\text{H-1\%}$  and 2% and (B) from PMA-ZI-10%- $\text{SO}_3\text{H-1\%}$  with different hydrophobic monomers. They were loaded with 10 wt% R18/F5-TPB. Given are mean values from three independent measurements. The error bars correspond to SEM.

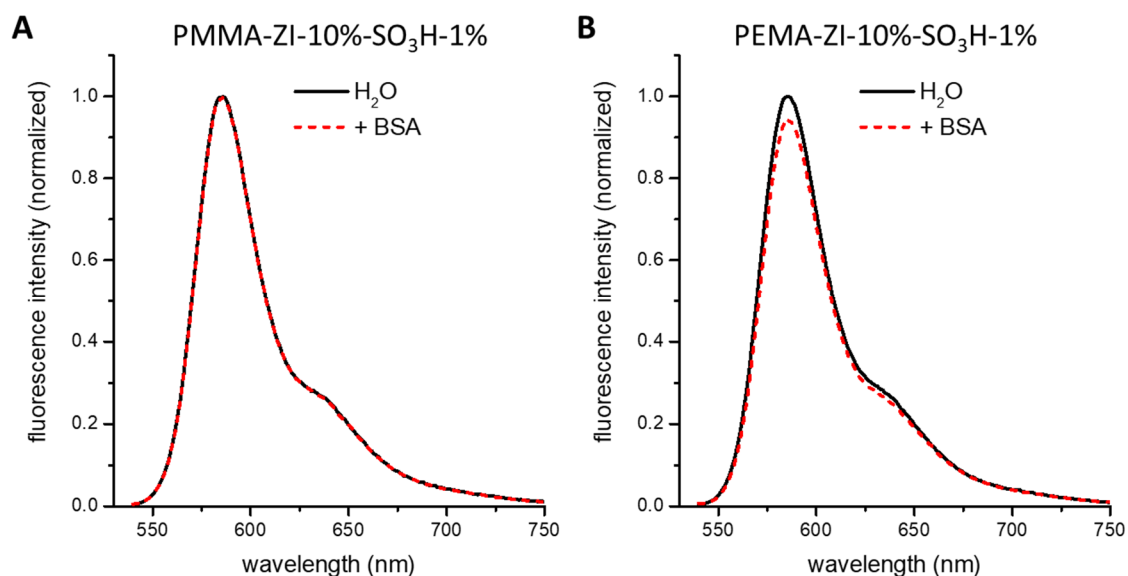

**Figure S4.** Fluorescence spectra of (A) PMMA-ZI-10%- $\text{SO}_3\text{H-1\%}$  and (B) PEMA-ZI-10%- $\text{SO}_3\text{H-1\%}$  NPs loaded with 10 wt% R18/F5-TPB in water and in the presence of 1 mg/mL bovine serum albumin (BSA).

**Table S6.** Per particle fluorescence brightness for different zwitterionic NPs loaded with 10 wt% R18/F5-TPB.<sup>a</sup>

| Main monomer | SO <sub>3</sub> H, (mol%) | ZI (mol%) | TEM (nm) | QY          | Brightness (M <sup>-1</sup> L <sup>-1</sup> ) |
|--------------|---------------------------|-----------|----------|-------------|-----------------------------------------------|
| MMA          | 1                         | 0         | 13 ± 3   | 0.58 ± 0.04 | 4.2 x 10 <sup>6</sup>                         |
| MMA          | 1                         | 10        | 11 ± 3   | 0.50 ± 0.02 | 2.2 x 10 <sup>6</sup>                         |
| MMA          | 2                         | 0         | 9 ± 3    | 0.50 ± 0.03 | 1.2 x 10 <sup>6</sup>                         |
| MMA          | 2                         | 10        | 9 ± 2    | 0.31 ± 0.03 | 0.9 x 10 <sup>6</sup>                         |
| EMA          | 1                         | 10        | 14 ± 3   | 0.51 ± 0.04 | 4.6 x 10 <sup>6</sup>                         |
| PMA          | 1                         | 10        | 22 ± 4   | 0.39 ± 0.03 | 1.4 x 10 <sup>6</sup>                         |
| BMA          | 1                         | 10        | 35 ± 7   | 0.35 ± 0.04 | 4.9 x 10 <sup>7</sup>                         |

<sup>a</sup> Brightness was calculated as: Brightness = N\* $\epsilon_{R18}$ \*QY, where N is the number of fluorophores based on the loading and the NP size,  $\epsilon_{R18}$  is the absorbance of R18 at 565 nm (125 000 M<sup>-1</sup>L<sup>-1</sup>) and QY is the measured quantum yield.

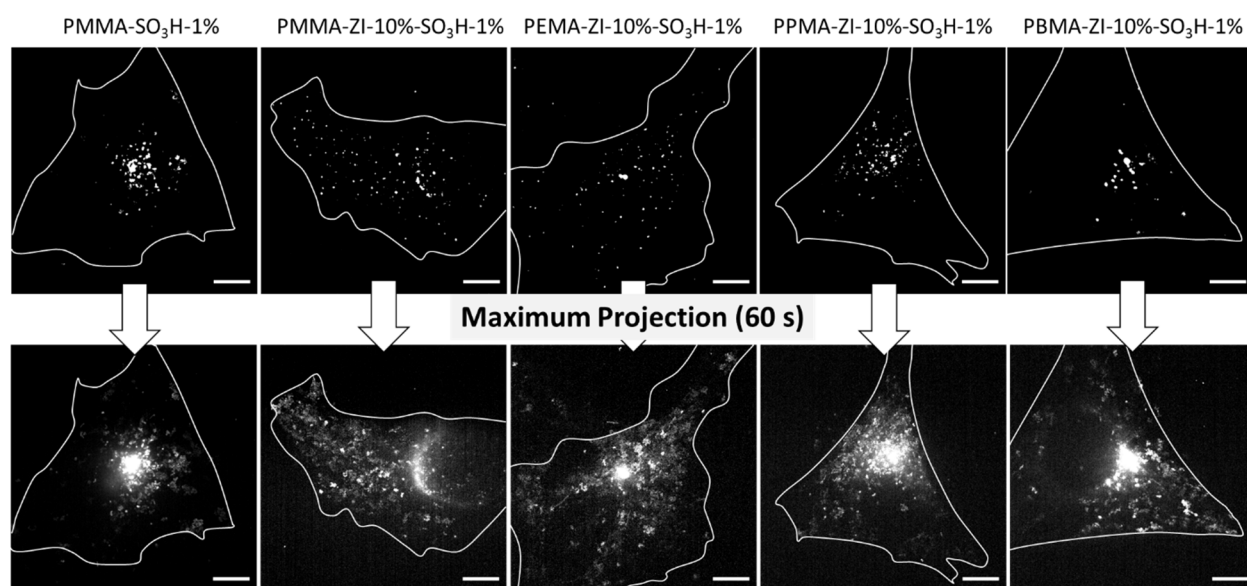

**Figure S5.** Approximate outline of cells obtained from phase-contrast images marked on representative epi-fluorescence micrographs of HeLa cells microinjected with different types of NPs loaded with 10 wt% R18/F5-TPB. Top: single frame (50 ms exposure); bottom: maximum projections over 60 s. Scale bars correspond to 10  $\mu\text{m}$ .

**Table S7.** Percentage of fluorescence at the injection point to total NP fluorescence in cells microinjected with different types of NPs loaded with 10 wt% R18/F5-TPB.

| polymer                          | Fluorescence at the injection point (%) <sup>a</sup> |
|----------------------------------|------------------------------------------------------|
| PMMA-SO <sub>3</sub> H-1%        | 39 $\pm$ 10                                          |
| PMMA-ZI-10%-SO <sub>3</sub> H-1% | 6 $\pm$ 2                                            |
| PEMA-ZI-10%-SO <sub>3</sub> H-1% | 10 $\pm$ 1                                           |
| PPMA-ZI-10%-SO <sub>3</sub> H-1% | 7 $\pm$ 2                                            |
| PBMA-ZI-10%-SO <sub>3</sub> H-1% | 35 $\pm$ 12                                          |

<sup>a</sup> The fluorescence in the entire cell and the fluorescence in a circle of about 5  $\mu\text{m}$  around the injection point were measured for at least 3 different fields of view per condition. Given is the ratio of fluorescence at the injection point to the total fluorescence in the NP channel in the cell.



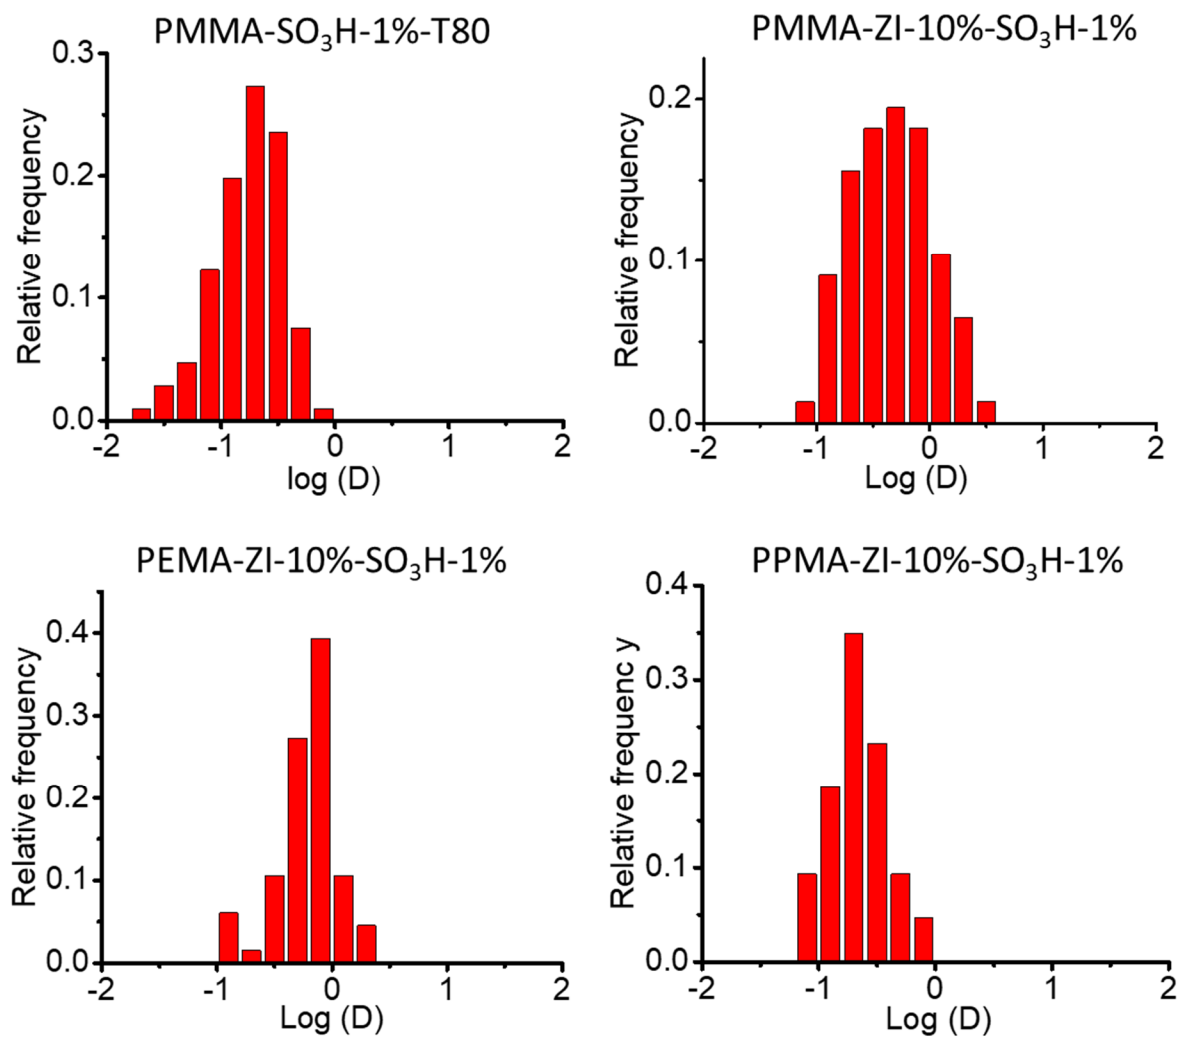

**Figure S6.** Distribution of diffusion coefficients ( $\mu\text{m}^2.\text{s}^{-1}$ ) of NPs in the cytosol obtained from MSD curves.
